# Supplementary material for: Paeonol inhibits the progression of intracerebral haemorrhage by mediating the HOTAIR/UPF1/ACSL4 axis
Source: PubMed Central journal article supplement — ASN Neuro. 2021 Apr 27;13:17590914211010647. doi: 10.1177/17590914211010647 (PMC8718120; doi:10.1177/17590914211010647), 2021-04-27
Supplement: sj-pdf-1-asn-10.1177_17590914211010647.pdf [file sj-pdf-1-asn-10.1177_17590914211010647.pdf]

This document certifies that the manuscript

**Paeonol inhibits the progression of intracerebral haemorrhage by mediating the  
HOTAIR/UPF1/ACSL4 axis**

prepared by the authors

**Ye-Feng Cai**

was edited for proper English language, grammar, punctuation, spelling, and overall style  
by one or more of the highly qualified native English speaking editors at AJE.

This certificate was issued on **December 29, 2020** and may be verified  
on the [AJE website](#) using the verification code **9514-CD81-BB04-7D13-724A**.

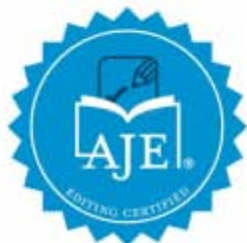

Neither the research content nor the authors' intentions were altered in any way during the editing process. Documents receiving this certification should be English-ready for publication; however, the author has the ability to accept or reject our suggestions and changes. To verify the final AJE edited version, please visit our verification page at [aje.com/certificate](#). If you have any questions or concerns about this edited document, please contact AJE at [support@aje.com](mailto:support@aje.com).
